# Supplementary material for: Increased Bone Marrow Uptake and Accumulation of Very-Late Antigen-4 Targeted Lipid Nanoparticles
Source: MDPI journal article supplement (doi:10.3390/pharmaceutics15061603), 2023-05-27
Supplement: s1 [file s1]

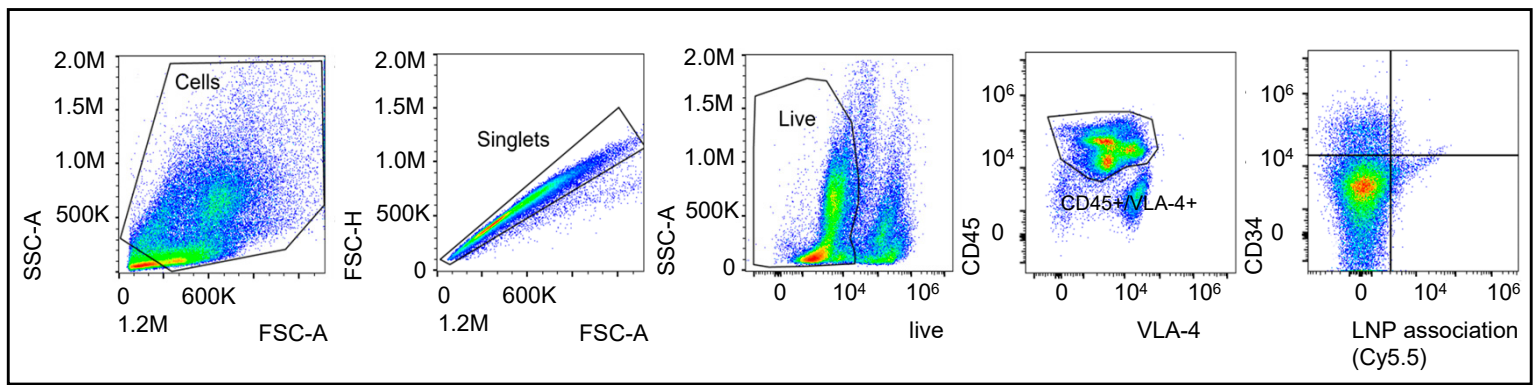

**Figure S1. Gating strategy for single bone marrow cells.** Bone marrow gating strategy shown for PBS-treated mouse. From left to right: the gating of cells (FSC-A versus SSC-A), singlets (FSC-H versus FSC-A), live cells (SSC-A versus live/dead stain), CD45+/VLA-4+ cells (CD45-A versus VLA-4 marker) and CD34-A versus LNP Cy5.5. The gates were set based on unstained controls.

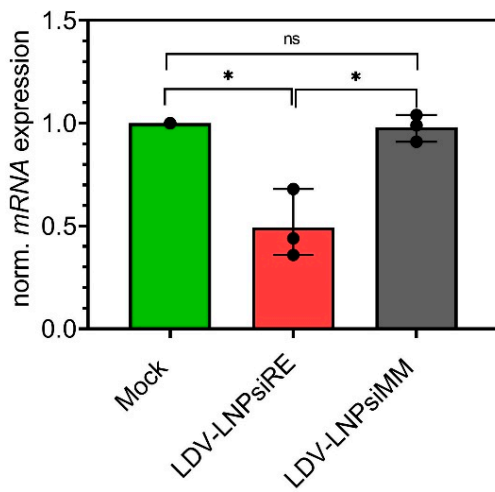

**Figure S2. Reduction of *RUNX1/ETO* transcript in PDX.** RUNX1/ETO-expressing AML cells were incubated for 24 hours with 4  $\mu$ g/ml siRNA LNPs followed by qPCR analysis at day 3. This figure displays a subset of the samples from Fig. 1f, samples are here normalized against the ddCt of the mock cells. Mean + range are displayed. Significance was tested by paired Student's t-test \*P < 0.05, \*\*P < 0.001, \*\*\*P < 0.001, n = 3

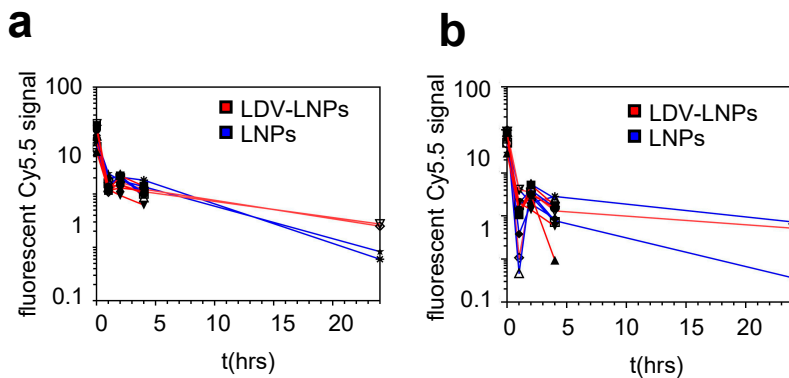

**Figure S3. Biodistribution of LDV-LNPs and LNPs in BALB/cAnNCrl mice.** (a, b) Circulation time of the LNPs on a log10 scale. Plasma concentration is expressed as the LNP Cy5.5 (a) or siRNA Cy7 (b) fluorescent signal in plasma. At various time points per individual mouse.

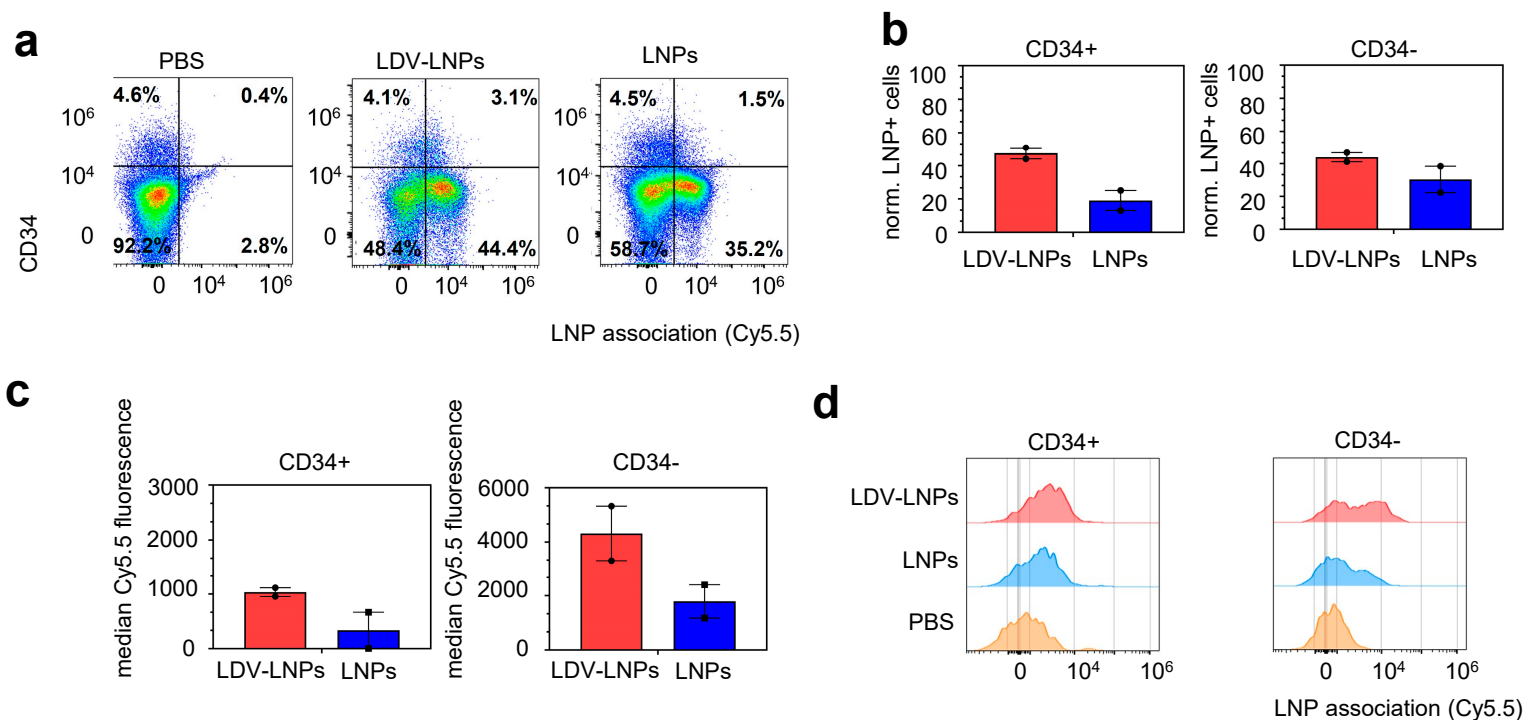

**Figure S4. Improved accumulation of LDV-LNPs in HPSC in the bone marrow.** (a) Scatter plots showing the CD34 expression and LNP association with CD45+/VLA-4+ cells in the bone marrow after 24 hours for mice treated with PBS, LDV-LNPs or LNPs as determined by multiparameter flow analysis. (b) Bar graphs showing the percentage of LNP+ cells in CD45+/VLA-4/CD34+ (left) or CD45+/VLA-4+/CD34- (right) bone marrow cells as determined by multiparameter flow analysis after 24 hours. (c, d) LNP Cy5.5 association in CD34+ (left) and CD34- (right) bone marrow cells after 24 hours displayed in bar graphs (c) or histograms (d) where LDV-LNPs is red, LNPs blue and control PBS orange. (b, c) Means + ranges are displayed. n = 2.

**Table S1.** –siRNA sequences and their chemical modifications. F, 2'-fluoronucleoside; OMe, 2'-methoxynucleoside; d, 2'-deoxynucleoside; PS, phosphorothioate-. For *in vivo* visualization the sense strand of the siRNA was modified with Cy7 linked via an NHS ester bond. The two swapped nucleotides in the mismatch siRNA control are displayed **bold**.

| Name         | 5' -> 3'                                                                                                                                                                                                                                                         | Supplier |
|--------------|------------------------------------------------------------------------------------------------------------------------------------------------------------------------------------------------------------------------------------------------------------------|----------|
| siRE-mod     | 5'-C <sub>F</sub> C <sub>F</sub> U <sub>F</sub> C <sub>F</sub> GAAAU <sub>OMe</sub> C <sub>OMe</sub> GU <sub>OMe</sub> AC <sub>OMe</sub> U <sub>OMe</sub> GdAdGdAdT <sub>PS</sub> dT-3'<br>3'-dT <sub>PS</sub> dTGGAGCUUUAGCAUGACUCU-5'                          | Axolabs  |
| siRE-mod-Cy7 | 5'-(Lumi-SulfoCy7-NHS)(NHC6)C <sub>F</sub> C <sub>F</sub> U <sub>F</sub> C <sub>F</sub> GAAAU <sub>OMe</sub> C <sub>OMe</sub> GU <sub>OMe</sub> AC <sub>OMe</sub> U <sub>OMe</sub> GdAdGdAdT <sub>PS</sub> dT-3'<br>3'-dT <sub>PS</sub> dTGGAGCUUUAGCAUGACUCU-5' | Axolabs  |
| siMM-mod     | 5'-C <sub>F</sub> C <sub>F</sub> U <sub>F</sub> C <sub>F</sub> GAAU <sub>OMe</sub> U <sub>OMe</sub> CGU <sub>OMe</sub> U <sub>OMe</sub> C <sub>OMe</sub> UGdAdGdAdT <sub>PS</sub> dT-3'<br>3'-dT <sub>PS</sub> dTGGAGCU <b>UA</b> AGCA <b>AG</b> ACUCU-5'        | Axolabs  |

**Table S2.** –qPCR primer sequences.

| Gene      |         | Sequence (5' -> 3')    |
|-----------|---------|------------------------|
| GAPDH     | Forward | GAAGGTGAAGGTCGGAGTC    |
|           | Reverse | GAAGATGGTGATGGGATTTC   |
| RUNX1/ETO | Forward | AATCACAGTGGATGGGCCC    |
|           | Reverse | TGCGTCTTCACATCCACAGG   |
| TBP       | Forward | CCTAAAGACCATTGCACTTCGT |
|           | Reverse | GTTCGTGGCTCTCTTATCCTCA |
